# Supplementary material for: Histamine causes an imbalance between pro-angiogenic and anti-angiogenic factors in the retinal pigment epithelium of diabetic retina via H4 receptor/p38 MAPK axis
Source: HighWire-hosted journal article supplement (doi:10.1136/bmjdrc-2020-001710), 2020-12-01
Supplement: bmjdrc-2020-001710supp001_data_supplement.pdf [file bmjdrc-2020-001710supp001_data_supplement.pdf]

Table 1. Primer sequences used for Real time PCR

| <b>Gene</b>  | <b>Sequence 5' to 3'</b> |                                  |
|--------------|--------------------------|----------------------------------|
| <b>HRH4</b>  | F: CCTCACACGCTGTTCGAATG  | R: CATAACAGATAGTCAGTAGTGAGCCAAAA |
| <b>VEGF</b>  | F: CAAAAACGAAAGCGCAAGAAA | R: GCGGGCACCAACGTACAC            |
| <b>IL-6</b>  | F: GGTACATCCTCGACGGCATCT | R: GTGCCTCTTTGCTGCTTTCAC         |
| <b>PEDF</b>  | F: TGCAGGCCAGATGAAAGGG   | R: TGAAGTCAGAGGTGAGGCTC          |
| <b>GAPDH</b> | F: CACATGGCCTCCAAGGAGTAA | R: TGAGGGTCTCTCTTCTCCTTGT        |
